## RESEARCH ARTICLE

# Intraspecific variation in physiological performance of a benthic elasmobranch challenged by ocean acidification and warming

Valentina Di Santo\*

**ABSTRACT**

Elucidating the combined effects of increasing temperature and ocean acidification on performance of fishes is central to our understanding of how species will respond to global climate change. Measuring the metabolic costs associated with intense and short activities, such as those required to escape predators, is key to quantifying changes in performance and estimating the potential effects of environmental stressors on survival. In this study, juvenile little skate *Leucoraja erinacea* from two neighboring locations (Gulf of Maine, or northern location, and Georges Bank, or southern location) were developmentally acclimatized and reared at current and projected temperatures (15, 18 or 20°C) and acidification conditions (pH 8.1 or 7.7), and their escape performance was tested by employing a chasing protocol. The results from this study suggest countergradient variation in growth between skates from the two locations, while the optimum for escape performance was at a lower temperature in individuals from the northern latitudes, which could be related to adaptation to the local thermal environment. Aerobic performance and scope declined in skates from the northern latitudes under simulated ocean warming and acidification conditions. Overall, the southern skates showed lower sensitivity to these climatic stressors. This study demonstrates that even mobile organisms from neighboring locations can exhibit substantial differences in energetic costs of exercise and that skates from the northern part of the geographic range may be more sensitive to the directional increase in temperature and acidification expected by the end of the century.

**KEY WORDS:** Aerobic scope, Climate change, Escape response, *Leucoraja erinacea*,  $P_{CO_2}$ , Thermal adaptation

**INTRODUCTION**

Temperature can vary considerably across the geographic range of a temperate species (Angilletta, 2009). This thermal gradient often favors the evolution of locally adapted populations that exhibit different ecological, morphological and physiological responses to changes in temperature. The accelerating changes in ocean temperature and chemistry (i.e. acidification) experienced by marine ecosystems and the pressing need to better predict the consequent shifts in distribution and resilience of species underscore the urgency to identify the response of organisms challenged by climate change-related stressors at a finer geographic scale. In fact, as carbon dioxide ( $CO_2$ ) and temperature increase in the oceans, the likelihood of individual species of marine ectotherms surviving local extinction may depend on the level of intraspecific variation in physiological responses and the capacity for acclimatization and rapid adaptation to

these major environmental stressors (Baumann and Conover, 2011; Di Santo, 2015; Donelson et al., 2011, 2012; Pörtner and Farrell, 2008; Rummer et al., 2014; Somero, 2010). Temperature is an important ecological factor, known to have a profound effect on many metabolic processes in aquatic ectotherms, such as fishes (Di Santo and Bennett, 2011a; Fry, 1971; Magnuson et al., 1979). At the same time, although some studies report little to no effect (or even a positive effect) of  $CO_2$  on fishes (see, for example, Green and Jutfelt, 2014; Heinrich et al., 2014; Jutfelt and Hedgärde, 2015; Rummer et al., 2013), several studies have presented data suggesting that increasing ocean acidification has the potential to exert several adverse effects on fish life history traits, such as malformation during skeletogenesis (Chambers et al., 2013), reduced survival (Baumann and Conover, 2011), reduced body condition and increased developmental time (Di Santo, 2015), as well as on several other important behavioral and physiological traits, such as alertness, predator avoidance and hunting (Ferrari et al., 2012a,b; Hamilton et al., 2014; Jutfelt et al., 2013; Munday et al., 2009; Näslund et al., 2015).

Predator evasion is considered a key factor in fish survival, especially during early life stages; it is a fundamental process that drives community dynamics (Dahlgren et al., 2006), and individuals with effective anti-predatory responses are able to survive, grow and reproduce. In elasmobranch fishes, the effect of warming and acidification on predator escape performance, especially for juveniles, may pose additional challenges because they grow slowly, thus increasing and prolonging the chance of being predated upon before reaching sexual maturity (DiBattista et al., 2007). Although the consequences of rapid ocean acidification and warming on escape performance could be high, no studies to date have evaluated their combined effect on an elasmobranch fish. To address this issue and improve predictions of species responses to environmental challenges, it is necessary to implement multistressor studies that quantify responses of individuals to simultaneous warming and acidification (Todgham and Stillman, 2013). Temperature is a crucial modulator of fish activities and ocean acidification could exacerbate the potential negative effect of warming on performance. Moreover, as individuals are likely to respond to abiotic stressors depending on their environmental history, it is increasingly being recognized that it is important to test individuals from different localities raised in common garden conditions to account for local adaptation of metabolic functions (Angilletta et al., 2004; Angilletta, 2001; Baumann and Conover, 2011; Di Santo, 2015; Lombardi-Carlson et al., 2003; Norin and Malte, 2012).

The little skate *Leucoraja erinacea* (Mitchill 1825) is a small benthic oviparous elasmobranch, reproducing year round, and inhabiting near-shore waters along the northwestern Atlantic from Cape Hatteras to the Gulf of Maine (GoM). Frisk and Miller (2006, 2009) found that growth of *L. erinacea* differed along its geographic range, with size-at-age increasing with latitude. In particular, *L. erinacea* from the GoM show significantly larger body size than conspecifics in Georges Bank (GB) and the Mid-Atlantic, perhaps

Museum of Comparative Zoology, Harvard University, Cambridge, MA 02138, USA.

\*Author for correspondence (vdisanto@fas.harvard.edu)

suggesting strong philopatry and low population exchange in the fish, although genetic data are still needed to designate population-level differences. However, this anecdotal evidence has been supported by empirical data showing that skates from the northern locality, the GoM, exhibited larger size at hatching when compared with individuals from the neighboring and more southern GB when reared in the same conditions, even though the trade-off was a reduced body condition in the larger skates (Di Santo, 2015). Interestingly, although inhabiting geographically contiguous areas, the GoM and GB *L. erinacea* show low mixing, which might have favored local thermal adaptation of metabolism and growth (Di Santo, 2015). In fact, although high-resolution data on pH and temperature at a fine geographic scale are scarce, especially for deeper waters typically inhabited by skates, the GB and the GoM present some potentially crucial abiotic differences. The GoM is much deeper, exceeding 200 m in depth, while the GB is shallower, with frequent upwelling (Signorini et al., 2013). The GB may therefore experience more frequent short-term variation in  $P_{\text{CO}_2}$ , salinity and temperature, but higher resolution data from the two locations are needed to confirm this (Pershing et al., 2001; Rossby, 1996; Signorini et al., 2013). As perturbation of metabolic rates may have consequences for fitness and therefore could affect resilience and survival of organisms, differences in whole-organism physiological responses along their geographic range may establish individual vulnerability to ocean warming and acidification (Barnes et al., 2010; Di Santo, 2015; Somero, 2010; Yamahira and Conover, 2002), thereby providing crucial information for implementation of effective conservation plans.

The maximum and routine metabolic rates (MMR and RMR, respectively) are key measures of performance that relate to Darwinian fitness (Bennett and Huey, 1990). In fact, maximal and routine performance may influence reproductive and competitive success, and the capacity to procure food and escape predators (Bennett and Huey, 1990; Pough, 1989). Although various methods are used to induce MMR, experiments that use chasing protocols have been found to elicit exhaustion and higher metabolic rates than classic critical swimming protocols in benthic fishes (Cutts et al., 2002; Roche et al., 2013; Svendsen et al., 2012). Moreover, manually chasing fish to exhaustion is regarded as a commonly used and appropriate method (Cutts et al., 2002; Roche et al., 2013; Svendsen et al., 2012) and approximates the energy needed to escape an intense chase by a predator. Here, I quantified the effects of ocean warming, acidification and location of origin on the performance of juvenile *L. erinacea* developmentally acclimatized to different pH and temperature conditions. To distinguish between the single and combined effect of each factor, I employed a fully crossed experimental design that compared (i) MMR and RMR, (ii)

absolute aerobic scope (AAS, the metabolic capacity to sustain the escape response), (iii) intensity of exercise (turns  $\text{min}^{-1}$ ) and (iv) recovery time after exhaustion in juvenile skates from the GoM and GB. I hypothesized that, similar to responses previously observed in embryos, juvenile *L. erinacea* from two locations would exhibit local adaptation in metabolic performance when developmentally acclimatized to different temperatures and acidification conditions.

## MATERIALS AND METHODS

### Animals and experimental set up

The research was conducted under the approved Institutional Animal Care and Use protocol no. 11-041 at Boston University. *Leucoraja erinacea* (total  $N=84$ ,  $N=42$  per location,  $N=7$  replicates per treatment per location, 6 treatments) were obtained from different females (i.e. one embryo per female,  $N=84$  females) caught at two localities, the GoM (43°N, 68°W;  $\sim 12^\circ\text{C}$ ) and GB (41.21°N, 67.38°W;  $\sim 15^\circ\text{C}$ ) and maintained at 15–16°C. Newly laid embryos (<1 week old) were transported in a constant-temperature tank, and were randomly assigned to a treatment group (1 embryo per replicate tank, 7 replicate tanks per treatment), and reared in common garden conditions in a temperature-controlled cold room (Harris Environmental Systems; 12°C) at Boston University throughout their embryonic development ( $\sim 5$  months) and after hatching ( $\sim 3$  months).

Temperature treatments (15, 18, 20°C) were chosen to test the performance at present and projected temperatures by the end of the century (Di Santo, 2015; IPCC, 2013; Palm et al., 2011). Each tank (150 l) was supplied with clean artificial seawater (Instant Ocean and deionized water) and had completely independent filtration, temperature and  $\text{CO}_2$  control (i.e. closed system, 84 independent tanks). Constant temperature (15, 18 or 20°C) was maintained in each tank by a submersible titanium heater unit (Finnex 300 W) controlled by a digital thermostat (Aqua Logic Inc.), and  $\text{CO}_2$  levels (with corresponding pH of 8.1 or 7.7) to simulate current and projected (year 2100) conditions according to the climatic model RCP 8.5 (IPCC, 2013; Riebesell et al., 2010). To maintain the appropriate pH, each tank was independently supplied with a mix of air: $\text{CO}_2$  (water pH 7.7 which resulted in  $P_{\text{CO}_2} \sim 1100 \mu\text{atm}$ ) or ambient air (water pH 8.1 which resulted in  $P_{\text{CO}_2} \sim 400 \mu\text{atm}$ ) and controlled by an independent Aqua Medic pH computer. Each  $\text{CO}_2$  system had an electronic solenoid that triggered the delivery of  $\text{CO}_2$  into a diffuser within the tank, if the pH increased above the set value. Each tank was covered with a clear Plexiglas® sheet to reduce fluctuations in  $\text{CO}_2$ . Total alkalinity was estimated using titration and reference material (Andrew Dickson, Scripps Institute of Oceanography, personal communication). Water parameters were calculated in CO2SYS (Pierrot et al., 2006) using suggested constants (Dickson and Millero, 1987) (Table 1). Temperature and

**Table 1. Mean  $\pm$  s.d. temperature, pH, carbonate chemistry, total alkalinity and salinity of experimental tanks**

| Parameter                                 | Treatment            |                      |                      |                      |                      |                      |
|-------------------------------------------|----------------------|----------------------|----------------------|----------------------|----------------------|----------------------|
|                                           | 1                    | 2                    | 3                    | 4                    | 5                    | 6                    |
| Temperature (°C)                          | 15.2 $\pm$ 0.7       | 15.0 $\pm$ 0.6       | 18.1 $\pm$ 0.6       | 17.9 $\pm$ 0.5       | 20.2 $\pm$ 0.6       | 19.7 $\pm$ 0.7       |
| pH <sub>NBS</sub>                         | 8.08 $\pm$ 0.05      | 7.73 $\pm$ 0.06      | 8.08 $\pm$ 0.12      | 7.71 $\pm$ 0.06      | 8.00 $\pm$ 0.11      | 7.71 $\pm$ 0.07      |
| $P_{\text{CO}_2}$ ( $\mu\text{atm}$ )     | 410.15 $\pm$ 19.16   | 1121.90 $\pm$ 69.81  | 412.81 $\pm$ 19.42   | 1086.22 $\pm$ 93.68  | 439.63 $\pm$ 27.70   | 1084.34 $\pm$ 73.39  |
| $\Omega_{\text{Ca}}$                      | 4.70 $\pm$ 0.91      | 2.54 $\pm$ 0.77      | 5.57 $\pm$ 2.01      | 2.46 $\pm$ 0.61      | 5.43 $\pm$ 0.64      | 2.74 $\pm$ 1.16      |
| $\Omega_{\text{Ar}}$                      | 3.01 $\pm$ 0.58      | 1.63 $\pm$ 0.49      | 3.59 $\pm$ 1.29      | 1.58 $\pm$ 0.39      | 3.51 $\pm$ 0.42      | 1.77 $\pm$ 0.75      |
| $\text{CO}_3$ ( $\mu\text{mol kg}^{-1}$ ) | 194.76 $\pm$ 37.57   | 105.37 $\pm$ 31.89   | 230.06 $\pm$ 83.05   | 1086.22 $\pm$ 93.68  | 223.74 $\pm$ 26.73   | 112.88 $\pm$ 47.98   |
| TA ( $\mu\text{mol kg}^{-1}$ )            | 2642.55 $\pm$ 314.69 | 2883.11 $\pm$ 472.49 | 2723.32 $\pm$ 639.53 | 2624.76 $\pm$ 369.72 | 2675.40 $\pm$ 210.94 | 2646.76 $\pm$ 504.42 |
| Salinity (ppt)                            | 33                   | 33                   | 33                   | 33                   | 33                   | 33                   |

$N=14$  replicates per treatment.

pH<sub>NBS</sub>, pH calibrated using National Bureau of Standards buffers;  $\Omega_{\text{Ca}}$ , calcium saturation;  $\Omega_{\text{Ar}}$ , aragonite saturation; TA, total alkalinity.

pH levels were monitored every 12 h using a Traceable NIST calibrated thermometer and a portable Hach pH meter. Each pH probe was calibrated weekly. Water quality analyses (ammonia, nitrites, nitrates, salinity, dissolved oxygen) were performed and 30% water changes were made weekly to ensure excellent water quality (no ammonia and nitrites), and constant salinity (33 ppt) and dissolved oxygen (>90%). Skates were reared on a 14 h:10 h light:dark photoperiod and, once hatched, were fed daily a diet of frozen mysis shrimp *ad libitum* but were fasted for 24 h prior to experiments.

### Respirometry and chasing protocol

Mass-adjusted metabolic rate ( $\dot{M}_{O_2}$  in  $\text{mg O}_2 \text{ g}^{-1} \text{ h}^{-1}$ ) was determined in 3 month old skates using intermittent respirometry (Steffensen, 1989) and calculated using the formula:

$$\dot{M}_{O_2} = (\text{O}_{2,\text{start}} - \text{O}_{2,\text{end}}) \times \text{volume of respirometer} \times \text{wet mass}^{-0.67} \times \text{time}^{-1}; \quad (1)$$

the mass exponent of 0.67 was used to correct for the allometric relationship between metabolic rate and mass in elasmobranchs (Di Santo and Bennett, 2011b; Meloni et al., 2002). RMR and MMR were measured at the same time of the day in the six treatment conditions. Individual skates were placed in a custom-made 1 cm-thick acrylic respirometer chamber (0.465 l) fitted with an optical oxygen probe (model ProODO YSI, Yellow Springs, OH, USA) and a recirculating pump, and submersed in a temperature- and pH-controlled water bath. RMR was measured at the same time of day as MMR, at 5 min intervals for 30 min after a 12 h acclimation period to the experimental chamber (Di Santo and Bennett, 2011b). MMR of juvenile skates was measured using the chasing protocol described by Cutts and co-authors (2002) and modified to accommodate skate behavior. Individual fish were quickly placed in a round tank and rotated on their back, forcing them to continually right themselves, while a second researcher measured the time until fatigue occurred by using a stop-watch. *Leucoraja erinacea* juveniles produced short intense swimming bursts as they righted themselves until reaching fatigue (i.e. righting behavior was no longer observed). The modified chasing protocol was necessary to elicit escape behavior as juvenile skates do not respond to simple hand or net chase (Cutts et al., 2002; Svendsen et al., 2012). Upon exhaustion, *L. erinacea* were transferred to the respirometer chamber where  $\text{O}_2$  measurements started immediately. Sampling continued for 1 h at 5 min intervals. Following each trial, a blank respirometer was run for 30 min but background respiration was never detected. MMR was calculated using the highest 5 min  $\dot{M}_{O_2}$  measurement for each fish. AAS was calculated by subtracting the RMR from the MMR, to give an approximation of the amount of energy that an individual can allocate to metabolic performance under different environmental conditions. Thermal sensitivity quotients ( $Q_{10}$ ) were calculated using mean  $\dot{M}_{O_2}$  values ( $R_1$  and  $R_2$ ) for skates at each locality at low ( $T_1=15^\circ\text{C}$ ) and high ( $T_2=20^\circ\text{C}$ ) temperatures using the equation:  $Q_{10}=(R_2/R_1)^{10/(T_2-T_1)}$ . A total of three exercise metrics were measured during the chasing protocol: the number of turns until reaching fatigue, the time from the beginning of exercise to the fatigue endpoint (i.e. endurance), and the intensity of exercise ( $\text{turns min}^{-1}$ ).

### Statistical analysis

All experimental values are reported as means $\pm$ s.e.m. Two sets of experiments ( $N=4$  and  $N=3$ ) were conducted about 6 months apart. To ensure there was not an effect of time on the results,

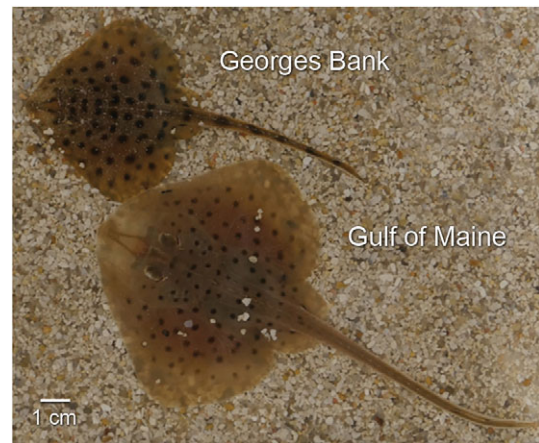

Fig. 1. *Leucoraja erinacea* (3 months old) from two locations, the Gulf of Maine and Georges Bank.

the two data sets were compared using an ANOVA but no significant difference was observed (all  $P>0.05$ ) so data were pooled together. The effects of temperature, pH and location of origin on metabolic rates were explored using a 3-way ANOVA after metabolic rates were mass-adjusted with the scaling coefficient used for elasmobranchs, followed by a Tukey–Kramer multiple comparison test (MCT) to identify statistical differences between treatment group means. The effects of temperature, pH, location and mass on exercise metrics were explored using a 3-way ANCOVA, with mass as the co-variate, followed by a Tukey–Kramer MCT to identify statistical differences between treatment group means. If interactions between factors were detected, they were reported following the analysis. Metabolic rates following fatigue were compared with RMR (controls) using a repeated measures ANOVA followed by a Dunnett’s test. All statistical comparisons were based on  $\alpha=0.05$ . All analyses were performed in JMP Pro version 11 (SAS Institute Inc.).

### RESULTS

The wet mass of juvenile (3 month old) *L. erinacea* from the GoM was significantly larger than that of same-age GB individuals, regardless of temperature and pH ( $24.61\pm 0.38$  and  $12.34\pm 0.16$  g, respectively; 3-way ANOVA:  $F_{7,76}=136.60$ ,  $P<0.0001$ ; Fig. 1). Overall, temperature and pH had no significant effect on the mass of juvenile skates ( $P>0.05$ ), with the exception that low pH exacerbated the effect of high temperature ( $20^\circ\text{C}$ ) on the mass of juvenile *L. erinacea* from the GoM, resulting in lower body mass

Table 2. Thermal sensitivity ( $Q_{10}$ ) for maximum and routine metabolic rates and absolute aerobic scope calculated across the temperature range ( $15\text{--}20^\circ\text{C}$ ) at two pH conditions for *Leucoraja erinacea* from Georges Bank and the Gulf of Maine

| pH            | MMR $Q_{10}$ | RMR $Q_{10}$ | AAS $Q_{10}$ |
|---------------|--------------|--------------|--------------|
| Georges Bank  |              |              |              |
| Control       | 2.83         | 11.47        | 1.98         |
| Low           | 0.90         | 7.64         | 0.40         |
| Gulf of Maine |              |              |              |
| Control       | 0.74         | 5.16         | 0.42         |
| Low           | 0.91         | 9.21         | 0.45         |

MMR, maximum metabolic rate; RMR, routine metabolic rate; AAS, absolute aerobic scope.

Control, pH 8.1; low, pH 7.7.  $N=7$  replicates per treatment.

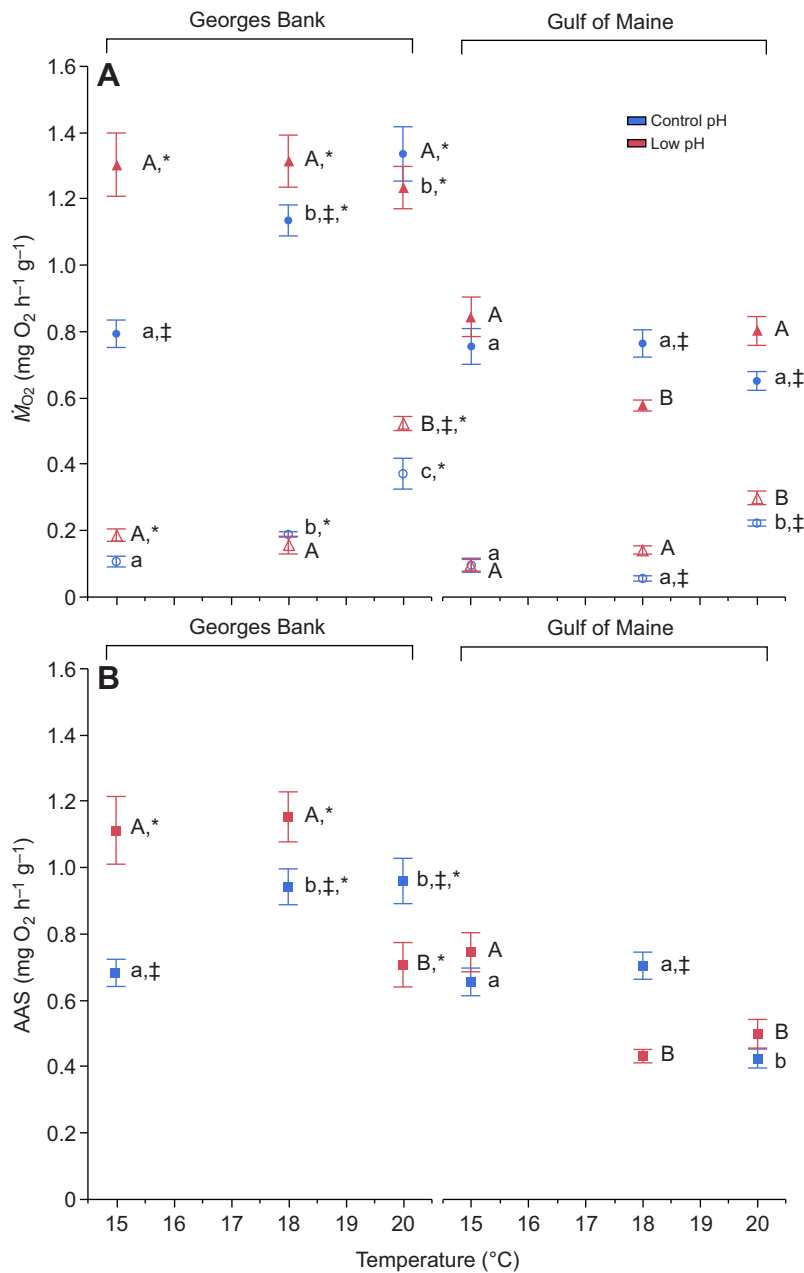

**Fig. 2. Effect of temperature and pH on metabolic rate in *L. erinacea*.** Mass-adjusted (A) maximum metabolic rate (MMR; filled circles and triangles), routine metabolic rate (RMR; open circles and triangles) and (B) absolute aerobic scope (AAS; squares) of *L. erinacea* (means±s.e.m.,  $N=7$  per treatment) from the Gulf of Maine and Georges Bank at three temperatures (15, 18 and 20°C) and two pH conditions (control pH 8.1, low pH 7.7). Metabolic rate was measured as the rate of oxygen consumption,  $\dot{M}_{O_2}$ . Different lowercase letters represent significant differences between temperatures in the control pH condition, while different uppercase letters represent significant differences between temperatures in the low pH condition. Double daggers represent significant differences between pH treatments at each temperature. Asterisks represent significant differences between skates from the two locations for each treatment. Tukey–Kramer multiple comparison test (MCT),  $\alpha=0.05$ .

(low pH:  $21.54 \pm 1.04$  g, control pH:  $26.11 \pm 0.39$  g; Dunnett's test,  $P=0.04$ ). The validity of the mass exponent 0.67 was tested using an ANCOVA on metabolic rates and resulted in similar statistical outcomes to the 3-way ANOVA on mass-adjusted rates, so results using the mass exponent 0.67 are reported instead.

MMR following exhaustion differed between the two locations (3-way ANOVA,  $F_{7,76}=31.24$ ,  $P<0.0001$ ; Fig. 2A), with a significant effect of pH ( $P=0.0004$ ) but no significant effect of temperature ( $P=0.07$ ). There was a significant interaction of the three treatments ( $P=0.0005$ ). Routine oxygen consumption rates were significantly affected by temperature, acidification and location (3-way ANOVA,  $F_{7,76}=19.04$ ,  $P<0.0001$ ; Fig. 2A). In particular, RMR significantly increased with temperature ( $P<0.0001$ ) and pH ( $P=0.002$ ), and was higher in the GB skates ( $P<0.0001$ ). Furthermore, there was a significant interaction between location and temperature ( $P=0.008$ ). AAS differed between individuals from different locations under different

conditions (3-way ANOVA;  $F_{7,76}=18.01$ ,  $P<0.0001$ ; Fig. 2B) and decreased with temperature ( $P=0.0004$ ). However, only the AAS of the GoM skates was significantly reduced by acidification and warming ( $P=0.002$ ), and pH levels alone did not have a statistically significant effect on AAS ( $P>0.05$ ). AAS had a significant effect on time to fatigue ( $P=0.0001$ ) and intensity of exercise ( $P<0.0001$ ), but had no effect on overall number of turns during exercise ( $P=0.3$ ). Thermal sensitivity quotients ( $Q_{10}$ ) in skates from both localities were high for RMR ( $Q_{10}>5$ ), while they were relatively insensitive for MMR ( $Q_{10} \approx 1$ , with the exception of GB skates at control pH conditions, which had a typical  $Q_{10}=2.83$ ; Table 2). Consequently,  $Q_{10}$  values for AAS showed a negative effect of temperature on rates (all  $Q_{10}<0.5$ , with the exception of GB skates at control pH conditions, which had a typical  $Q_{10}=1.98$ ; Table 2).

Overall, all exercise metrics (endurance, number of turns to reach fatigue, and intensity of exercise) were affected by treatments across

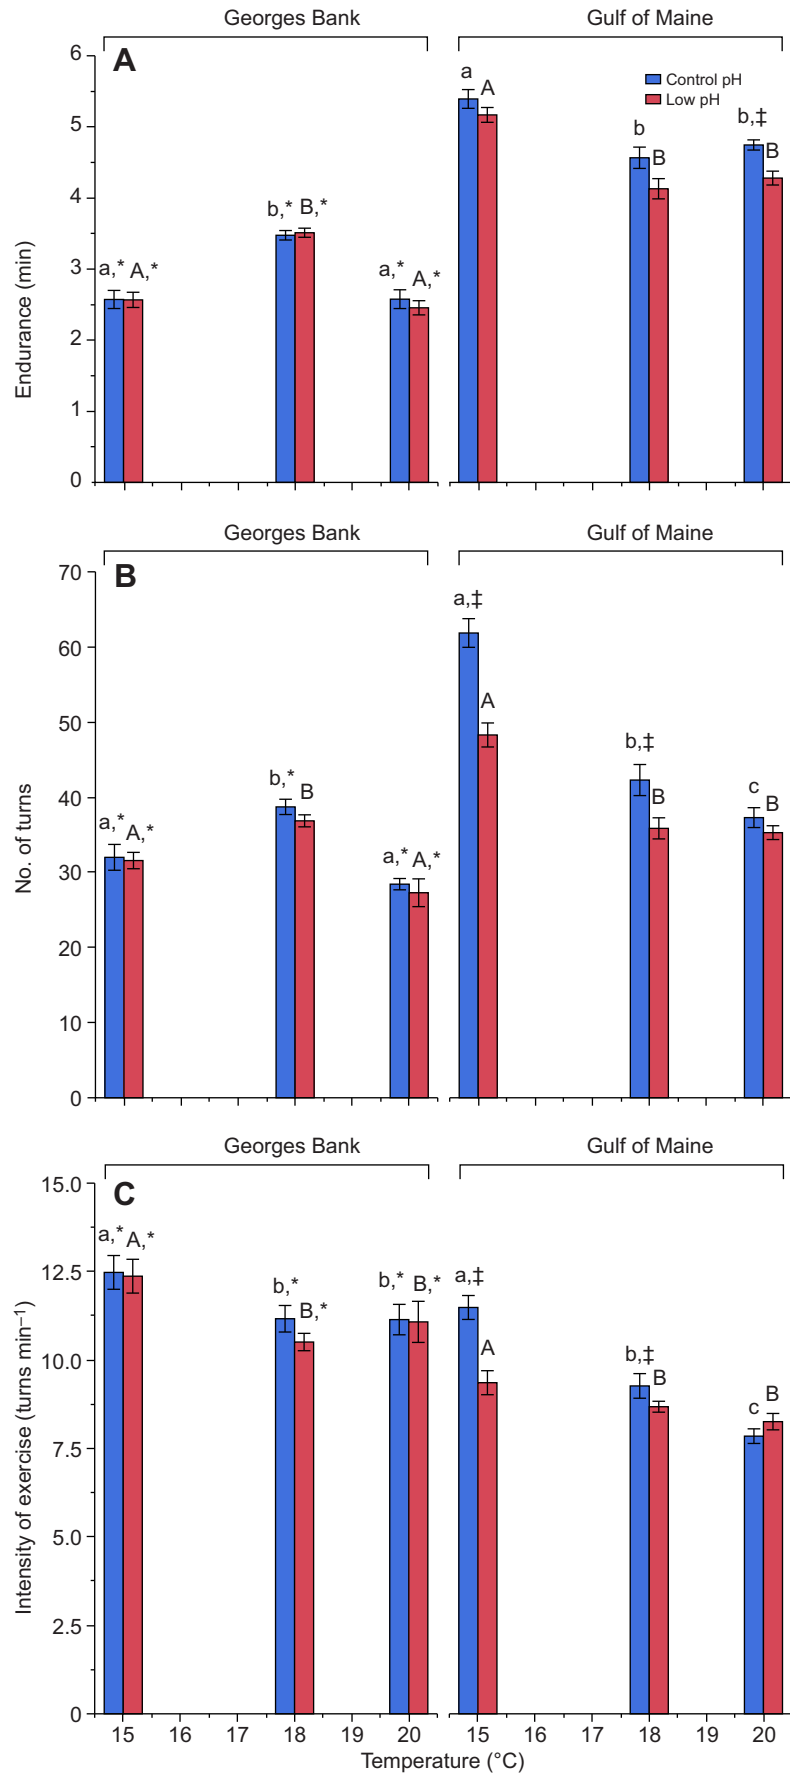

**Fig. 3. Effect of temperature and pH on exercise metrics in *L. erinacea*.** (A) Endurance, (B) number of turns and (C) intensity of exercise of *L. erinacea* (means±s.e.m., *N*=7 per treatment) from the Gulf of Maine and Georges Bank at three temperatures (15, 18 and 20°C) and two pH conditions (control pH 8.1, low pH 7.7). Different lowercase letters represent significant differences between temperatures in the control pH condition, while different uppercase letters represent significant differences between temperatures in the low pH condition. Double daggers represent significant differences between pH treatments at each temperature. Asterisks represent significant differences between skates from the two locations for each treatment. Tukey–Kramer MCT,  $\alpha=0.05$ .

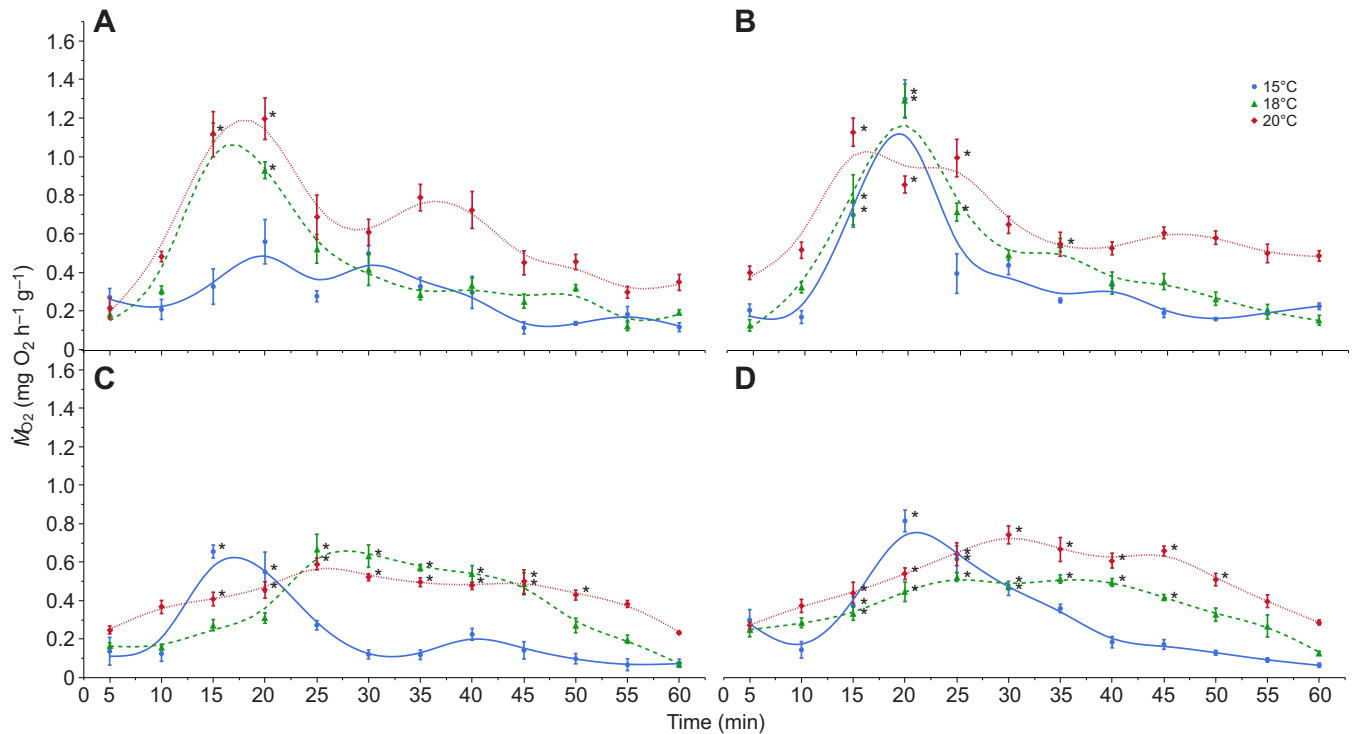

**Fig. 4.** Post-exhaustion oxygen consumption ( $\dot{M}_{O_2}$ ) responses to temperature and pH in *L. erinacea*. Data are from juvenile *L. erinacea* from two locations, Georges Bank (A,B) and Gulf of Maine (C,D) (means $\pm$ s.e.m.,  $N=7$  per treatment), raised in common garden conditions to mimic current and future levels of warming and acidification (control pH 8.1, A,C; low pH 7.7, B,D). Asterisks indicate significant differences in mean oxygen consumption between RMR (controls) and post-exhaustion metabolic rate (repeated measures ANOVA followed by Dunnett's test,  $P<0.05$ ).

locations (3-way ANCOVA, all  $P<0.0001$ ; Fig. 3). There was a significant interaction between location and temperature in time to fatigue ( $P=0.0005$ ) and number of turns to fatigue ( $P=0.005$ ; Fig. 3). Additionally, significant interactions were found in the intensity of exercise, in particular between location (or mass) and pH ( $P=0.02$ ), and location (or mass), temperature and pH level ( $P=0.02$ ). In this study, body mass was closely linked to location of origin, regardless of treatment ( $P<0.0001$ ); therefore, it is not surprising that the two factors show a similar effect on the physiological responses tested. Juvenile skates from GB recovered faster from exercise than skates from the GoM (Fig. 4). Even though acidification increased recovery time across locations, skates from the GoM exhibited elevated metabolic rates for as much as double the time of individuals from GB under higher temperatures and acidification conditions (Dunnett's test,  $P<0.05$ ; Fig. 4). Metabolic rates returned to RMR levels within 50 min of exercise (repeated measures ANOVA, Dunnett's test,  $P<0.05$ ; Fig. 4).

## DISCUSSION

This study is the first to investigate the effects of ocean acidification and warming on the performance of an elasmobranch sampled at different localities and developmentally acclimatized in a common garden experimental set-up. The present multistressor study demonstrated that even within a small geographic distance, it is possible to find locally adapted individuals of mobile marine organisms that respond differently to two major climatic stressors. Growth performance in *L. erinacea* from two locations raised in common garden conditions exhibited the same thermal optimum but GoM skates grew to a larger body size at the same age compared with those from GB across the experimental temperatures used in this study, suggesting countergradient variation in performance.

These findings confirm previous experimental work on *L. erinacea* embryos that found strong evidence for local adaptation in body size (Di Santo, 2015) as well as field observations that described the same pattern but could not discern the effect of plasticity from adaptation (Frisk and Miller, 2006, 2009). Here, fish from two geographic locations were raised under the same conditions as newly laid embryos, therefore eliminating the effect of different acclimatization levels on individuals. Although embryos were obtained from wild-caught females held in different laboratories, these were kept at about 15–16°C, reducing the potential effect of different transgenerational acclimation in the fish (Donelson et al., 2012; Ho and Burggren, 2009). Furthermore, each egg was obtained from a different female and yet had similar yolk size, suggesting that parental body condition was not a significant factor in development (Di Santo, 2015; Vleck and Vleck, 1986).

Interestingly, embryonic little skates from both the GoM and the GB exhibit a metabolic performance thermal optimum around 18°C (Di Santo, 2015), while the results from the present study showed that the thermal optimum for performance is shifted ontogenetically towards lower temperatures in the GoM skates but not in the GB skates, as they move from the embryonic to the juvenile stage. These results seem to suggest that GoM skates may be even more vulnerable to warming and acidification as juveniles than embryos, albeit the effect on fitness may be only sub-lethal. Similar patterns of variation in life history traits have developed in several fishes along latitudinal gradients as the result of thermal adaptation in growth and metabolic rates. For instance, a similar pattern of variation was observed in the growth of the Atlantic silverside *Menidia menidia* along the coast in the northwestern Atlantic (Baumann and Conover, 2011) and in the respiratory performance of several coral reef fishes in the Great Barrier Reef (Gardiner et al.,

2010). However, a larger body size could potentially have important trade-offs (Fangue et al., 2009). In fact, AAS was greater in skates from GB while it was significantly depressed in the GoM skates across the same temperature range. Conversely, GoM skates were able to endure the escape response for a longer period of time and righted themselves more times before fatiguing. The greater AAS measured in the GB skates may provide the capacity to recover from a more intense, but shorter, escape response. Performance in juveniles from GB peaked at 18°C, while GoM skates showed a decline in all performance parameters with temperature increase. Rates of physiological processes typically show a 2- to 3-fold increase for each 10°C increase in ambient temperature (Schmidt-Nielsen, 1990). However, in this study, RMR between the low and high temperatures increased dramatically ( $Q_{10} > 5$ ). This increase in RMR  $Q_{10}$  values and the relative thermal insensitivity of MMR explain the decline of AAS with temperature (with the exception of GB skates at control pH; Fig. 2, Table 2). High  $Q_{10}$  values for RMR have been attributed to fish species that live in stable environments (Rummer et al., 2014) as well as species that exploit thermal variability in their environment to enhance physiological processes (Hopkins and Cech, 1994). Often,  $Q_{10}$  values for RMR do not directly correlate with the ability to enhance specific physiological processes (e.g. swimming or digestion efficiency; Di Santo and Bennett, 2011b), but as the results from this study show, they might explain the reduction in AAS with increasing temperature. Consequently, even though a 3–5°C increase in average temperature was not lethal for juvenile skates from the GoM, it reduced endurance during the escape response to chasing, prolonged recovery time after exhaustion and lowered aerobic scope with the potential to decrease fitness and local persistence in near-future projected climate change. Moreover, in both localities, low pH increased the recovery time after exhaustive exercise. Possibly, acidification may have caused an elevation in  $P_{CO_2}$  and  $HCO_3^-$  in the plasma (Green and Jutfelt, 2014), thereby increasing the costs associated with maintaining homeostasis. It is therefore possible that these additional costs might have significantly prolonged the time to recovery as young skates had to ‘pay off’ the oxygen debt after exhaustive anaerobic exercise (Svendsen et al., 2012; Webb, 1994).

High-energy output is required during anaerobic bursts (Webb, 1994) and these are typically associated with fast escapes; thus, reduced capacity for intense activity is likely to impact an individual’s ability to survive predation (Allan et al., 2014; Johnson and Bennett, 1995). Although righting and escape bursts involve anaerobic pathways, these will be negatively impacted by a reduced aerobic scope (Svendsen et al., 2012). In fact, intensive anaerobic exercise results in an oxygen debt that must be accounted for at the expense of other important activities such as foraging. It is possible, however, that some fishes at higher latitudes would benefit from allocating most of their energy towards growth at the expense of other metabolic activities. For example, this might allow skates from the GoM to develop faster to compensate for a shorter growth season. The drop in escape performance of GoM skates would manifest at temperatures that are just a few degrees (~3°C) higher than those currently experienced by individuals at this particular location, thereby pushing performance beyond its thermal optimum. It has been suggested that the negative effects of climate change stressors on species may be mitigated through geographic shifts toward cooler areas (Burrows et al., 2011; Chen et al., 2011; Genner et al., 2010; Somero, 2010). However, generally, skates show strong site fidelity, and some species do not seem to recolonize nearby areas where other populations were extirpated (Dulvy and Reynolds, 2002;

Dulvy et al., 2003), but more empirical data on this particular species are needed. In addition, another coping mechanism could involve a shift in phenology, particularly for reproduction, to adjust to warmer temperatures (Gardner et al., 2011). However, *L. erinacea* has a long embryonic stage (Di Santo et al., 2016) and lays eggs year-round, so temperature is not a strong factor in determining reproductive timing and behavior (Palm et al., 2011).

Although increasing ocean acidification and warming are likely to have substantial effects across species at different latitudes, we need a better understanding of which particular traits can confer an advantage to more tolerant phenotypes (Lauder and Di Santo, 2015). The results from this study underscore the importance and benefits of employing multistressor experimental designs, in which crucial physiological traits are evaluated in organisms from different latitudes and populations (Todgham and Stillman, 2013). Furthermore, by reducing aerobic scope and escape endurance, increases in temperature and acidification beyond optimal conditions are likely to compromise vital activities such as predator evasion in fishes. This study shows that skates from the GoM tend to be more sensitive to acidification than those from GB, and their performance declines at temperatures above 15°C. The responses of the GB skates to increased acidification and temperature are more promising; skates from this locality recover much faster after exhaustive exercise, and acidification exerts a less detrimental effect on metabolic rates and therefore escape responses. It is possible that *L. erinacea* from GB might be already ‘pre-adapted’ to acidification because of the elevated and frequent fluctuations in pH in their environment as a consequence of strong upwelling in the area (Pershing et al., 2001). Alternatively, it is possible that given that GoM skates have a reduced aerobic capacity, they might be more strongly affected by elevated plasma  $P_{CO_2}$  and  $HCO_3^-$  (as seen in other elasmobranch species; Green and Jutfelt, 2014) as a consequence of increased acidification.

Lastly, variation in size between individuals complicates the interpretation of the results, as body mass is closely linked to location of origin, regardless of treatment, and larger fish (from the northern locality) generally tend to exhibit higher sensitivity to sub-optimal environmental conditions than smaller conspecifics (from the more southern locality) (Pörtner, 2010). Sensitivity to warming and acidification could perhaps be a function of local adaptation of body size, rather than metabolic adaptation of the escape response to local environmental conditions. A shift towards smaller body size has been invoked as one of the universal responses to global warming (Gardner et al., 2011). In fact, smaller fishes are known to be more tolerant and to perform better at higher temperatures than larger conspecifics (Di Santo and Lobel, 2016; Pörtner, 2010). In this study, skates from two locations exhibited differences in body size as well as physiological responses to environmental challenges that are not plastic but rather seem to be genetically fixed as developmental acclimatization to common garden conditions did not eliminate them. However, as body mass may affect physiological responses of fish species to ocean warming and acidification, future studies should also include analyses of different size classes rather than a single one, if the objective is to forecast more realistic responses. Ultimately, the differences in escape performance observed in *L. erinacea* from two locations underscore the importance of investigating intraspecific variation in physiological responses of species challenged by climate change stressors.

#### Acknowledgements

I thank George Lauder for critical logistic and conceptual support, James Sulikowski, NOAA and the Marine Biological Laboratory for providing some of the skates used in

this study, and Phil Lobel for sharing laboratory space. Anna Tran helped during trials. Chris Pomory provided helpful suggestions during data analysis. Eric Widmaier, John Mandelman, Phil Lobel, Pam Templer, Jud Crawford and two anonymous reviewers provided useful suggestions and comments on a previous version of this manuscript.

### Competing interests

The author declares no competing or financial interests.

### Funding

This research was funded by the American Fisheries Society, the American Society of Ichthyologists and Herpetologists, The American Elasmobranch Society, Flying Sharks, The Oceanário de Lisboa, and The Portuguese Association for the Study and Conservation of Elasmobranchs. While conducting the research and writing the manuscript, V.D.S. was supported by the Warren-McLeod, Ryan Kelley, and Dana Wright fellowships.

### References

- Allan, B. J. M., Miller, G. M., McCormick, M. I., Domenici, P. and Munday, P. L. (2014). Parental effects improve escape performance of juvenile reef fish in a high-CO<sub>2</sub> world. *Proc. R. Soc. B Biol. Sci.* **281**.
- Angilletta, M. J. Jr. (2001). Variation in metabolic rate between populations of a geographically widespread lizard. *Physiol. Biochem. Zool.* **74**, 11–21.
- Angilletta, M. J. (2009). *Thermal Adaptation: A Theoretical and Empirical Synthesis*. Oxford: Oxford University Press.
- Angilletta, M. J., Oufiero, C. E. and Sears, M. W. (2004). Thermal adaptation of maternal and embryonic phenotypes in a geographically widespread ectotherm. *Int. Congress Ser.* **1275**, 258–266.
- Barnes, D. K. A., Peck, L. S. and Morley, S. A. (2010). Ecological relevance of laboratory determined temperature limits: colonization potential, biogeography and resilience of Antarctic invertebrates to environmental change. *Glob. Change Biol.* **16**, 3164–3169.
- Baumann, H. and Conover, D. O. (2011). Adaptation to climate change: contrasting patterns of thermal-reaction-norm evolution in Pacific versus Atlantic silversides. *Proc. R. Soc. B Biol. Sci.* **278**, 2265–2273.
- Bennett, A. F. and Huey, R. B. (1990). Studying the evolution of physiological performance. *Oxf. Surv. Evol. Biol.* **7**, 251–284.
- Burrows, M. T., Schoeman, D. S., Buckley, L. B., Moore, P., Poloczanska, E. S., Brander, K. M., Brown, C., Bruno, J. F., Duarte, C. M., Halpern, B. S. et al. (2011). The pace of shifting climate in marine and terrestrial ecosystems. *Science* **334**, 652–655.
- Chambers, R. C., Candelmo, A. C., Habeck, E. A., Poach, M. E., Wicczorek, D., Cooper, K. R., Greenfield, C. E. and Phelan, B. A. (2013). Ocean acidification effects in the early life-stages of summer flounder, *Paralichthys dentatus*. *Biogeosci. Discuss.* **10**, 13897–13929.
- Chen, I.-C., Hill, J. K., Ohlemüller, R., Roy, D. B. and Thomas, C. D. (2011). Rapid range shifts of species associated with high levels of climate warming. *Science* **333**, 1024–1026.
- Cutts, C. J., Metcalfe, N. B. and Taylor, A. C. (2002). Juvenile Atlantic salmon (*Salmo salar*) with relatively high standard metabolic rates have small metabolic scopes. *Funct. Ecol.* **16**, 73–78.
- Dahlgren, C., Kellison, G. T., Adams, A. J., Gillanders, B. M., Kendall, M. S., Layman, C. A., Ley, J. A., Nagelkerken, I. and Serafy, J. E. (2006). Marine nurseries and effective juvenile habitats: concepts and applications. *Mar. Ecol. Prog. Ser.* **312**, 291–295.
- Di Santo, V. (2015). Ocean acidification exacerbates the impacts of global warming on embryonic little skate, *Leucoraja erinacea* (Mitchill). *J. Exp. Mar. Biol. Ecol.* **463**, 72–78.
- Di Santo, V. and Bennett, W. A. (2011a). Is post-feeding thermotaxis advantageous in elasmobranch fishes? *J. Fish Biol.* **78**, 195–207.
- Di Santo, V. and Bennett, W. A. (2011b). Effect of rapid temperature change on resting routine metabolic rates of two benthic elasmobranchs. *Fish Physiol. Biochem.* **37**, 929–934.
- Di Santo, V. and Lobel, P. S. (2016). Size affects digestive responses to increasing temperature in fishes: physiological implications of being small under climate change. *Mar. Ecol.* doi:10.1111/maec.12358.
- Di Santo, V., Tran, A. H. and Svendsen, J. C. (2016). Progressive hypoxia decouples activity and aerobic performance of skate embryos. *Conserv. Physiol.* **4**, cov067.
- DiBattista, J. D., Feldheim, K. A., Gruber, S. H. and Hendry, A. P. (2007). When bigger is not better: selection against large size, high condition and fast growth in juvenile lemon sharks. *J. Evol. Biol.* **20**, 201–212.
- Dickson, A. G. and Millero, F. J. (1987). A comparison of the equilibrium constants for the dissociation of carbonic acid in seawater media. *Deep Sea Res. Part 1 Oceanogr. Res. Pap.* **34**, 1733–1743.
- Donelson, J. M., Munday, P. L., McCormick, M. I. and Nilsson, G. E. (2011). Acclimation to predicted ocean warming through developmental plasticity in a tropical reef fish. *Glob. Change Biol.* **17**, 1712–1719.
- Donelson, J. M., Munday, P. L., McCormick, M. I. and Pitcher, C. R. (2012). Rapid transgenerational acclimation of a tropical reef fish to climate change. *Nat. Clim. Change* **2**, 30–32.
- Dulvy, N. K. and Reynolds, J. D. (2002). Predicting extinction vulnerability in skates. *Conserv. Biol.* **16**, 440–450.
- Dulvy, N. K., Sadovy, Y. and Reynolds, J. D. (2003). Extinction vulnerability in marine populations. *Fish Fish.* **4**, 25–64.
- Fangue, N. A., Richards, J. G. and Schulte, P. M. (2009). Do mitochondrial properties explain intraspecific variation in thermal tolerance? *J. Exp. Biol.* **212**, 514–522.
- Ferrari, M. C. O., McCormick, M. I., Munday, P. L., Meekan, M. G., Dixon, D. L., Lönnstedt, O. and Chivers, D. P. (2012a). Effects of ocean acidification on visual risk assessment in coral reef fishes. *Funct. Ecol.* **26**, 553–558.
- Ferrari, M. C. O., Manassa, R. P., Dixon, D. L., Munday, P. L., McCormick, M. I., Meekan, M. G., Sih, A. and Chivers, D. P. (2012b). Effects of ocean acidification on learning in coral reef fishes. *PLoS ONE* **7**, e31478.
- Frisk, M. G. and Miller, T. J. (2006). Age, growth, and latitudinal patterns of two Rajidae species in the northwestern Atlantic: little skate (*Leucoraja erinacea*) and winter skate (*Leucoraja ocellata*). *Can. J. Fish. Aquat. Sci.* **63**, 1078–1091.
- Frisk, M. G. and Miller, T. J. (2009). Maturation of little skate and winter skate in the western Atlantic from Cape Hatteras to Georges Bank. *Mar. Coast. Fish.* **1**, 1–11.
- Fry, F. E. J. (1971). The effect of environmental factors on the physiology of fish. In *Fish Physiology* (ed. W. S. Hoar and D. J. Randall), pp. 1–98. Cambridge, MA: Academic Press.
- Gardiner, N. M., Munday, P. L. and Nilsson, G. E. (2010). Counter-gradient variation in respiratory performance of coral reef fishes at elevated temperatures. *PLoS ONE* **5**, e13299.
- Gardner, J. L., Peters, A., Kearney, M. R., Joseph, L. and Heinsohn, R. (2011). Declining body size: a third universal response to warming? *Trends Ecol. Evol.* **26**, 285–291.
- Genner, M. J., Sims, D. W., Southward, A. J., Budd, G. C., Masterson, P., Mchugh, M., Rendle, P., Southall, E. J., Wearmouth, V. J. and Hawkins, S. J. (2010). Body size-dependent responses of a marine fish assemblage to climate change and fishing over a century-long scale. *Glob. Change Biol.* **16**, 517–527.
- Green, L. and Jutfelt, F. (2014). Elevated carbon dioxide alters the plasma composition and behaviour of a shark. *Biol. Lett.* **10**, 20140538.
- Hamilton, T. J., Holcombe, A. and Tresguerres, M. (2014). CO<sub>2</sub>-induced ocean acidification increases anxiety in rockfish via alteration of GABAA receptor functioning. *Proc. R. Soc. B Biol. Sci.* **281**, 20132509.
- Heinrich, D. D. U., Rummer, J. L., Morash, A. J., Watson, S.-A., Simpfendorfer, C. A., Heupel, M. R. and Munday, P. L. (2014). A product of its environment: the epaulette shark (*Hemiscyllium ocellatum*) exhibits physiological tolerance to elevated environmental CO<sub>2</sub>. *Conserv. Physiol.* **2**, cou047.
- Ho, D. H. and Burggren, W. W. (2009). Epigenetics and transgenerational transfer: a physiological perspective. *J. Exp. Biol.* **213**, 3–16.
- Hopkins, T. E. and Cech, J. J., Jr (1994). Effect of temperature on oxygen consumption of the bat ray, *Myliobatis californica* (Chondrichthyes, Myliobatidae). *Copeia* **1994**, 529–532.
- IPCC (2013). *Climate Change: The Assessment Reports of the Intergovernmental Panel on Climate Change*. Working Group I Contribution to the Fifth Assessment Report of the Intergovernmental Panel on Climate Change. Cambridge, UK and New York, USA.
- Johnson, T. and Bennett, A. (1995). The thermal acclimation of burst escape performance in fish: an integrated study of molecular and cellular physiology and organismal performance. *J. Exp. Biol.* **198**, 2165.
- Jutfelt, F. and Hedgärde, M. (2015). Juvenile Atlantic cod behavior appears robust to near-future CO<sub>2</sub> levels. *Front. Zool.* **12**, 11.
- Jutfelt, F., de Souza, K. B., Vuylsteke, A. and Sturve, J. (2013). Behavioural disturbances in a temperate fish exposed to sustained high-CO<sub>2</sub> levels. *PLoS ONE* **8**, e65825.
- Lauder, G. V. and Di Santo, V. (2015). Swimming mechanics and energetics of elasmobranch fishes. In *Fish Physiology Vol. 34A, Physiology of Elasmobranch Fishes: Structure and Interaction with Environment* (ed. R. E. Shadwick, A. P. Farrell and C. J. Brauner), pp. 219–253. New York: Academic Press.
- Lombardi-Carlson, L. A., Cortés, E., Parsons, G. R. and Manire, C. A. (2003). Latitudinal variation in life-history traits of bonnethead sharks, *Sphyrna tiburo*, (Carcharhiniformes: Sphyrnidae) from the eastern Gulf of Mexico. *Mar. Freshwater Res.* **54**, 875–883.
- Magnuson, J. J., Crowder, L. B. and Medvick, P. A. (1979). Temperature as an ecological resource. *Am. Zool.* **19**, 331–343.
- Meloni, C. J., Cech, J. J., Jr., Katzman, S. M. and Gatten, R. E. Jr. (2002). Effect of brackish salinities on oxygen consumption of bat rays (*Myliobatis californica*). *Copeia* **2002**, 462–465.
- Munday, P. L., Dixon, D. L., Donelson, J. M., Jones, G. P., Pratchett, M. S., Devitsina, G. V. and Døving, K. B. (2009). Ocean acidification impairs olfactory discrimination and homing ability of a marine fish. *Proc. Natl. Acad. Sci. USA* **106**, 1848–1852.



- Näslund, J., Lindström, E., Lai, F. and Jutfelt, F.** (2015). Behavioural responses to simulated bird attacks in marine three-spined sticklebacks after exposure to high CO<sub>2</sub> levels. *Mar. Freshwater Res.* **66**, 877–885.
- Norin, T. and Malte, H.** (2012). Intraspecific variation in aerobic metabolic rate of fish: relations with organ size and enzyme activity in brown trout. *Physiol. Biochem. Zool.* **85**, 645–656.
- Palm, B., Koester, D. M., Driggers, W. B. and Sulikowski, J. A.** (2011). Seasonal variation in fecundity, egg case viability, gestation, and neonate size for little skates, *Leucoraja erinacea*, in the Gulf of Maine. *Environ. Biol. Fishes* **92**, 585–589.
- Pershing, A. J., Wiebe, P. H., Manning, J. P. and Copley, N. J.** (2001). Evidence for vertical circulation cells in the well-mixed area of Georges Bank and their biological implications. *Deep Sea Res. Part 2 Top. Stud. Oceanogr.* **48**, 283–310.
- Pierrot, D., Lewis, E. and Wallace, D. W. R.** (2006). MS Excel program developed for CO<sub>2</sub> system calculations. ORNLCDIAC-105a. Carbon Dioxide Information Analysis Center, Oak Ridge National Laboratory, US Department of Energy, Oak Ridge Tennessee.
- Pörtner, H. O.** (2010). Oxygen- and capacity-limitation of thermal tolerance: a matrix for integrating climate-related stressor effects in marine ecosystems. *J. Exp. Biol.* **213**, 881–893.
- Pörtner, H. O. and Farrell, A. P.** (2008). ECOLOGY: Physiology and climate change. *Science* **322**, 690–692.
- Pough, F. H.** (1989). Organismal performance and Darwinian fitness: approaches and interpretations. *Physiol. Zool.* **62**, 199–236.
- Riebesell, U., Fabry, V. J., Hansson, L. and Gattuso, J.-P.** (ed.) (2010). *Guide to Best Practices for Ocean Acidification Research and Data Reporting*, 260pp. Luxembourg: Publications Office of the European Union.
- Roche, D. G., Binning, S. A., Bosiger, Y., Johansen, J. L. and Rummer, J. L.** (2013). Finding the best estimates of metabolic rates in a coral reef fish. *J. Exp. Biol.* **216**, 2103–2110.
- Rosby, T.** (1996). The North Atlantic Current and surrounding waters: at the crossroads. *Rev. Geophys.* **34**, 463–481.
- Rummer, J. L., Stecyk, J. A. W., Couturier, C. S., Watson, S.-A., Nilsson, G. E. and Munday, P. L.** (2013). Elevated CO<sub>2</sub> enhances aerobic scope of a coral reef fish. *Conserv. Physiol.* **1**, cot023.
- Rummer, J. L., Couturier, C. S., Stecyk, J. A. W., Gardiner, N. M., Kinch, J. P., Nilsson, G. E. and Munday, P. L.** (2014). Life on the edge: thermal optima for aerobic scope of equatorial reef fishes are close to current day temperatures. *Glob. Change Biol.* **20**, 1055–1066.
- Schmidt-Nielsen, K.** (1990). *Animal Physiology: Adaptation and Environment*. Cambridge: Cambridge University Press.
- Signorini, S. R., Mannino, A., Najjar, R. G., Friedrichs, M. A. M., Cai, W.-J., Salisbury, J., Wang, Z. A., Thomas, H. and Shadwick, E.** (2013). Surface ocean pCO<sub>2</sub> seasonality and sea-air CO<sub>2</sub> flux estimates for the North American east coast. *J. Geophys. Res. Oceans* **118**, 5439–5460.
- Somero, G. N.** (2010). The physiology of climate change: how potentials for acclimatization and genetic adaptation will determine 'winners' and 'losers'. *J. Exp. Biol.* **213**, 912–920.
- Steffensen, J.** (1989). Some errors in respirometry of aquatic breathers: how to avoid and correct for them. *Fish Physiol. Biochem.* **6**, 49–59.
- Svendsen, J. C., Steffensen, J. F., Aarestrup, K., Frisk, M., Etzerodt, A. and Jyde, M.** (2012). Excess posthypoxic oxygen consumption in rainbow trout (*Oncorhynchus mykiss*): recovery in normoxia and hypoxia. *Can. J. Zool.* **90**, 1–11.
- Todgham, A. E. and Stillman, J. H.** (2013). Physiological responses to shifts in multiple environmental stressors: relevance in a changing world. *Integr. Comp. Biol.* **53**, 539–544.
- Vleck, C. M. and Vleck, D.** (1986). Metabolism and energetics of avian embryos. *J. Exp. Zool.* **1**, 111–125.
- Webb, P. W.** (1994). The biology of fish swimming. In *The Mechanics and Physiology of Animal Swimming* (ed. L. Maddock, Q. Bone and J. M. V. Rayner), pp. 45–62. Cambridge: Cambridge University Press.
- Yamahira, K. and Conover, D. O.** (2002). Intra- vs. interspecific latitudinal variation in growth: adaptation to temperature or seasonality? *Ecology* **83**, 1252–1262.
